# Supplementary material for: Myc‐dependent endothelial proliferation is controlled by phosphotyrosine 1212 in VEGF receptor‐2
Source: PubMed Central journal article supplement (PMC6832004; doi:10.15252/embr.201947845), 2019-09-23

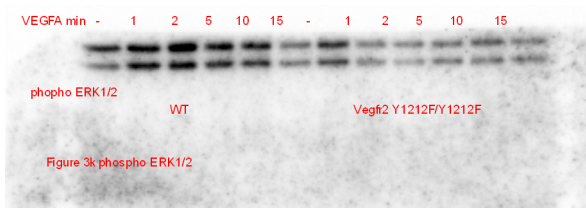

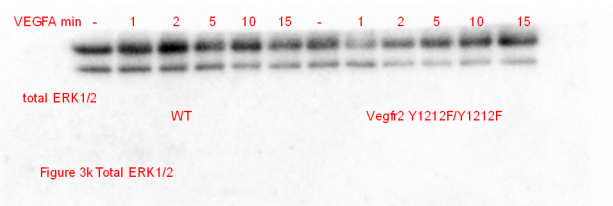

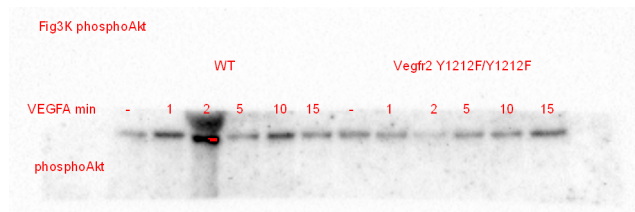

Supplement: EMBR-20-e47845-s002.pdf [file EMBR-20-e47845-s002.pdf]
